# Supplementary material for: Description of the Soil Diatom Sellaphora terrestris sp. nov. (Bacillariophyceae, Sellaphoraceae) from Vietnam, with Remarks on the Phylogeny and Taxonomy of Sellaphora and Systematic Position of Microcostatus
Source: MDPI journal article supplement (doi:10.3390/plants11162148), 2022-08-18
Supplement: s1 [file s1]

Supplementary table S1. Taxa and DNA sequence data used in phylogenetic analysis.

| Clade    | Strain     | taxa according to GenBank | taxa or provisional names according to references | Origin (Date)                                                             | the GenBank accession no. |          |
|----------|------------|---------------------------|---------------------------------------------------|---------------------------------------------------------------------------|---------------------------|----------|
|          |            |                           |                                                   |                                                                           | <i>rbcL</i>               | 18S rDNA |
| Clade 1A | Sel781INV  | <i>S. auldreekie</i>      | <i>S. auldreekie</i>                              | United Kingdom: 55.9614 N 3.0679 W (2008)                                 | KC911805                  | –        |
|          | DUN3       | <i>S. auldreekie</i>      | <i>S. auldreekie</i>                              | United Kingdom: Scotland, Edinburgh, Dunsapie Loch 55.94 N 3.15 W (2003)  | EF143277                  | –        |
|          | DUN2       | <i>S. auldreekie</i>      | <i>S. auldreekie</i>                              | Scotland: Dunsapie Loch (2003)                                            | EF143268                  | –        |
|          | Sel776INV  | <i>S. auldreekie</i>      | <i>S. auldreekie</i>                              | United Kingdom: 55.9614 N 3.0679 W (2007)                                 | KC911804                  | –        |
|          | BLA2       | <i>S. auldreekie</i>      | <i>S. auldreekie</i>                              | United Kingdom: Scotland, Edinburgh, Blackford Pond 55.92 N 3.20 W (2004) | EF143303                  | –        |
|          | DUN4       | <i>S. auldreekie</i>      | <i>S. auldreekie</i>                              | Scotland: Dunsapie Loch (2003)                                            | EF143267                  | –        |
|          | BLA1       | <i>S. auldreekie</i>      | <i>S. auldreekie</i>                              | Scotland: Blackford Pond NT 253709 (1996)                                 | EF143320                  | –        |
| Clade 1A | Cr44       | <i>S. auldreekie</i>      | <i>S. auldreekie</i>                              | Australia: 37.8003 S 145.2819 E (2007)                                    | KC911803                  | –        |
|          | DUN1       | <i>S. auldreekie</i>      | <i>S. auldreekie</i>                              | Scotland: Dunsapie Loch NT 281731 (1996)                                  | EF143276                  | EF151965 |
|          | mm185      | <i>S. pupula</i>          | <i>S. pupula</i> agg. “mumblin auldreekie”        | Australia: 38.3189 S 142.9144 E (2007)                                    | KC911816                  | –        |
|          | mm135      | <i>S. pupula</i>          | <i>S. pupula</i> agg. “mumblin auldreekie”        | Australia: 38.3189 S 142.9144 E (2007)                                    | KC911814                  | –        |
|          | mm178      | <i>S. pupula</i>          | <i>S. pupula</i> agg. “mumblin auldreekie”        | Australia: 38.3189 S 142.9144 E (2007)                                    | KC911815                  | –        |
|          | Sel629K    | <i>S. pupula</i>          | <i>S. pupula</i> agg. “southern auldreekie”       | Australia: 37.7881 S 145.0433 E (2007)                                    | KC911807                  | –        |
|          | RBGE Kew21 | <i>S. pupula</i>          | <i>S. pupula</i> agg. “southern auldreekie”       | Australia: 37.7881 S, 145.0433 E (2007)                                   | HQ317119<br>HQ337598      | –        |
|          | KewA3      | <i>S. pupula</i>          | <i>S. pupula</i> agg. “southern auldreekie”       | Australia: 37.7881 S 145.0433 E (2007)                                    | KC911806                  | –        |

|          |            |                          |                                             |                                                                           |                      |          |
|----------|------------|--------------------------|---------------------------------------------|---------------------------------------------------------------------------|----------------------|----------|
|          | Str13      | <i>S. pupula</i>         | <i>S. pupula</i> agg. "southern auldreekie" | Australia: 37.7286 S 145.0944 E (2007)                                    | KC911811             | –        |
|          | BB94       | <i>S. pupula</i>         | <i>S. pupula</i> agg. "another auldreekie"  | Australia: 37.77 S 145.08 E (2007)                                        | HQ317121<br>HQ337600 | –        |
|          | BolinA2    | <i>S. pupula</i>         | <i>S. pupula</i> agg. "coarse auldreekie"   | Australia: 37.7692 S 145.0783 E (2007)                                    | KC911808             | –        |
|          | Sel627K    | <i>S. pupula</i>         | <i>S. pupula</i> agg. "coarse auldreekie"   | Australia: 37.7881 S 145.0433 E (2007)                                    | KC911810             | –        |
|          | Sel642K    | <i>S. pupula</i>         | <i>S. pupula</i> agg. "coarse auldreekie"   | Australia: 37.7881 S 145.0433 E (2007)                                    | KC911809             | –        |
|          | LE J9      | <i>S. pupula</i>         | <i>S. pupula</i> agg. "Czech auldreekie"    | United Kingdom: 55.9606 S 3.1618 E (2007)                                 | KC911812             | –        |
| Clade 1A | LE D35     | <i>S. pupula</i>         | <i>S. pupula</i> agg. "Czech auldreekie"    | United Kingdom: 55.9606 S 3.1618 E (2007)                                 | KC911813             | –        |
|          | RGBE 28/28 | <i>S. pupula</i>         | <i>S. pupula</i> agg. "Czech auldreekie"    | Czech Republic: Cerny pond 50.61 N 14.76 E                                | HQ317129<br>HQ337609 | –        |
| Clade 1B | Bfp04      | <i>S. blackfordensis</i> | <i>S. blackfordensis</i>                    | No date                                                                   | JN418674             | –        |
|          | KME 2009a  | <i>S. sp.</i>            | <i>S. bisexualis</i> SEL9B                  | United Kingdom: Scotland, Edinburgh, Blackford Pond 55.92 N 3.20 W (2003) | HQ317111<br>HQ337609 | –        |
|          | RBG1       | <i>S. pupula</i>         | <i>S. pupula</i> agg. "elliptical"          | Scotland: Royal Botanic Garden Pond (NT 248753)                           | EF143271             | EF151962 |
|          |            |                          | <i>S. bisexualis</i>                        |                                                                           |                      |          |
|          | BLA15      | <i>S. pupula</i>         | <i>S. pupula</i> agg. "elliptical"          | Scotland: Blackford Pond (2003)                                           | EF143321             | –        |
|          | BLA14      | <i>S. pupula</i>         | <i>S. pupula</i> agg. "elliptical"          | Scotland: Blackford Pond (2003)                                           | EF143294             | –        |
|          |            |                          | <i>S. bisexualis</i>                        |                                                                           |                      |          |
|          | THR9       | <i>S. pupula</i>         | <i>S. pupula</i> agg. "elliptical"          | United Kingdom: Scotland, Threipmuir Reservoir 55.86 N 3.33 W (2003)      | EF143297             | EF151972 |
|          |            |                          | <i>S. pupula</i> agg. "upland elliptical"   |                                                                           |                      |          |

|          |              |                      |                                                  |                                                                          |                      |          |
|----------|--------------|----------------------|--------------------------------------------------|--------------------------------------------------------------------------|----------------------|----------|
|          | THR10        | <i>S. pupula</i>     | <i>S. pupula</i> agg. “elliptical”               | Scotland: Threipmuir Reservoir (2003)                                    | EF143296             | –        |
|          |              |                      | <i>S. pupula</i> agg. “upland elliptical”        |                                                                          |                      |          |
| Clade 1B | RGBE B155    | <i>S. pupula</i>     | <i>S. pupula</i> agg. “southern elliptical”      | Australia: Victoria, Grampians, Lake Bellfield 37.18 S 142.54 E(2007)    | HQ317120<br>HQ337599 | –        |
|          | THR13        | <i>S. pupula</i>     | <i>S. pupula</i> agg. “small blunt–capitate”     | Scotland: Threipmuir Reservoir (2003)                                    | EF143272             | –        |
|          | THR8         | <i>S. pupula</i>     | <i>S. pupula</i> agg. cf. “small blunt–capitate” | Scotland: Threipmuir Reservoir (2003)                                    | EF143308             | –        |
|          | GER1         | <i>S. pupula</i>     | <i>S. pupula</i> agg. “europa”                   | Germany: Friedheimer See 53°31'23" N, 8°39'54" E (1997)                  | EF143318             | EF151984 |
|          | THR11        | <i>S. pupula</i>     | <i>S. pupula</i> agg. “large”                    | Scotland: Threipmuir Reservoir (1997)                                    | EF143285             | EF151970 |
| Clade 2A | BLA5         | <i>S. bacillum</i>   | <i>S. bacillum</i>                               | Scotland: Blackford Pond (2003)                                          | EF143284             | –        |
|          | BLA4         | <i>S. bacillum</i>   | <i>S. bacillum</i>                               | Scotland: Blackford Pond (2003)                                          | EF143311             | –        |
|          | E3147        | <i>S. bacillum</i>   | <i>S. bacillum</i> BLA3                          | Scotland: Blackford Pond (1996)                                          | AY571745             | EF151980 |
|          | ST-MAR1      | <i>S. bacillum</i>   | <i>S. bacillum</i>                               | Scotland: St Margarets Loch (1996)                                       | EF143273             | –        |
|          | SEL601As     | <i>S. obesa</i>      | <i>S. obesa</i>                                  | United Kingdom: England, Ashford lake 53.23 N 1.70 W (2007)              | HQ337592             | –        |
|          | THR14        | <i>S. pupula</i>     | <i>S. pupula</i> agg. “small lanceolate”         | Scotland: Threipmuir Reservoir (1996)                                    | EF143264             | EF151963 |
| Clade 2A | RGBE SEL834L | <i>S. pupula</i>     | <i>S. pupula</i> agg. “small lanceolate”         | United Kingdom: Scotland, Perthshire, Loch Leven 56.18 N 3.34 W 9 (2008) | HQ317116<br>HQ337594 | –        |
|          | BLA12        | <i>S. lanceolata</i> | <i>S. lanceolata</i>                             | Scotland: Blackford Pond (2003)                                          | EF143315             | –        |
|          | BLA13        | <i>S. lanceolata</i> | <i>S. lanceolata</i>                             | Scotland: Blackford Pond (2003)                                          | EF143305             | EF151978 |
|          | RGBE SEL212D | <i>S. pupula</i>     | <i>S. pupula</i> sensu sticto                    | Scotland: Edinburgh, Dunsapie Loch (2003)                                | HQ317117<br>HQ337596 | –        |
|          | RGBE 32/83   | <i>S. pupula</i>     | <i>S. pupula</i> agg. “thick”                    | Czech Republic: Hradcansky pond. 50.62 N 14.71 E (2007)                  | HQ317128<br>HQ337608 | –        |
| Clade 2B | DUN8         | <i>S. pupula</i>     | <i>S. pupula</i> agg. “small capitate”           | Scotland: Dunsapie Loch (2003)                                           | EF143270             | –        |
|          | DUN7         | <i>S. pupula</i>     | <i>S. pupula</i> agg. “small capitate”           | Scotland: Dunsapie Loch (2003)                                           | EF143269             | EF151961 |

|         |               |                          |                                           |                                                                          |                      |          |
|---------|---------------|--------------------------|-------------------------------------------|--------------------------------------------------------------------------|----------------------|----------|
|         | RGBE 28/36    | <i>S. pupula</i>         | <i>S. pupula</i> agg. cf “marvanii”       | Czech Republic: Cerny pond 50.61 N 14.76 E (2007)                        | HQ317124<br>HQ337604 | –        |
|         | RGBE 28/6     | <i>S. pupula</i>         | <i>S. pupula</i> agg. cf “marvanii”       | Czech Republic: Cerny pond 50.61 N 14.76 E (2007)                        | HQ317125<br>HQ337605 | –        |
|         | RGBE 060      | <i>S. pupula</i>         | <i>S. pupula</i> agg. “pseudolanceolate”  | Czech Republic: Obectov 49.73 N 16.93 E E (2007)                         | HQ317127<br>HQ337607 | –        |
|         | RGBE 068      | <i>S. pupula</i>         | <i>S. pupula</i> agg. “rod”               | Czech Republic: Obectov 49.73 N 16.93 E (2007)                           | HQ317126<br>HQ337606 | –        |
|         | RBG2          | <i>S. pupula</i>         | <i>S. pupula</i> agg. “little”            | Scotland: Royal Botanic Garden Pond (1996)                               | EF143275             | EF151964 |
|         | BLA16         | <i>S. pupula</i>         | <i>S. pupula</i> agg. “spindle”           | Scotland: Blackford Pond (2005)                                          | EF143298             | EF151974 |
|         | Ak1876        | <i>S. sp.</i>            | <i>S. sp.</i>                             | Japan:Hokkaido, Lake Toro (2020)                                         | LC648444             | –        |
|         | TCC524        | <i>S. minima</i>         | <i>S. minima</i>                          | France: Reunion island Saint Denis river upstream site AEP socket (2009) | KF959642             | –        |
|         |               | <i>S. cf. minima</i>     | <i>S. cf. minima</i>                      | Scotland: Blackford Pond (1997)                                          | EF143279             | EF151966 |
| Clade 3 | BAL1          | <i>S. blackfordensis</i> | <i>S. blackfordensis</i>                  | Scotland: Balgavies Loch 56.65 N 2.77 W (1997)                           | EF143310             | –        |
|         | (Bfp5x8)F 1-3 | <i>S. blackfordensis</i> | <i>S. blackfordensis</i>                  | Culture collection BCCM/DCG                                              | JN418669             | –        |
|         | RBGE BAL7(3)  | <i>S. blackfordensis</i> | <i>S. blackfordensis</i>                  | United Kingdom: Scotland, Balgavies Loch (1997)                          | HQ317112<br>HQ337589 | –        |
|         | DUN5          | <i>S. blackfordensis</i> | <i>S. blackfordensis</i>                  | Scotland: Dunsapie Loch (2003)                                           | EF143319             | –        |
|         | BLA8          | <i>S. blackfordensis</i> | <i>S. blackfordensis</i>                  | Scotland: Blackford Pond (1997)                                          | EF143290             | –        |
|         | BLA6          | <i>S. blackfordensis</i> | <i>S. blackfordensis</i>                  | Scotland: Blackford Pond (1996)                                          | EF143282             | EF151969 |
|         | BLA7          | <i>S. blackfordensis</i> | <i>S. blackfordensis</i>                  | Scotland: Blackford Pond (?)                                             | EF143283             | –        |
| Clade 3 | AUS1          | <i>S. pupula</i>         | <i>S. pupula</i> agg. “southern capitata” | Australia: Hacking River 34°04'22" S, 151°03'27" E (2001)                | EF143312             | EF151982 |
|         | AUS2          | <i>S. pupula</i>         | <i>S. pupula</i> agg. “southern capitata” | Australia: Hacking River (2001)                                          | EF143306             | –        |
|         | AUS3          | <i>S. pupula</i>         | <i>S. pupula</i> agg. “southern capitata” | Australia: Hacking River (2001)                                          | EF143278             | –        |

|         |                       |                  |                                                 |                                                                          |                      |          |
|---------|-----------------------|------------------|-------------------------------------------------|--------------------------------------------------------------------------|----------------------|----------|
|         | SEL793Tm              | <i>S. pupula</i> | <i>S. pupula</i> agg. “gross”                   | United Kingdom: Scotland, Threipmuir Reservoir (2008)                    | HQ317131<br>HQ337613 | –        |
|         | THR7                  | <i>S. pupula</i> | <i>S. pupula</i> agg. cf. “capitata”            | Scotland: Threipmuir Reservoir (1998)                                    | EF143302             | EF151976 |
|         | E4391                 | <i>S. sp.</i>    | <i>S. caput</i> K.M. Evans & D.G. Mann          | United Kingdom: Scotland, Loch Tulla 56.55 N 4.75 W (2003)               | HQ317114<br>HQ337591 | –        |
|         | AUS4                  | <i>S. pupula</i> | <i>S. pupula</i> agg. “southern pseudocapitate” | Australia: Hacking River (2001)                                          | EF143317             | EF151983 |
|         | RGBE BB92             | <i>S. pupula</i> | <i>S. pupula</i> agg. “australis”               | Australia: Victoria, Melbourne, Bolin Billabong 37.77 S 145.08 E (2007)  | HQ317118<br>HQ337597 | –        |
|         | THR12                 | <i>S. pupula</i> | <i>S. pupula</i> agg. “pseudocapitate”          | Scotland: Threipmuir Reservoir (1998)                                    | EF143292             | –        |
|         | RGBE (L845 + Thr42)F1 | <i>S. pupula</i> | <i>S. pupula</i> agg. “pseudocapitate”          | United Kingdom: Scotland (1999)                                          | HQ317115<br>HQ337593 | –        |
|         | F1                    | <i>S. pupula</i> | <i>S. pupula</i> agg. “pseudocapitate”          | F1 clone (1999)                                                          | EF143291             | –        |
|         | US1                   | <i>S. pupula</i> | <i>S. pupula</i> agg. “pseudocapitate”          | USA: Black Dog Lake Creek, Dakota County, Minnesota (1996)               | EF143314             | –        |
| Clade 3 | KEL–2015              | <i>S. sp.</i>    | <i>S. sp.</i>                                   | USA: Georgia, Milledgeville, south of airport 33.1472 N 83.2505 W (2013) | KM999065             | –        |
|         | BLA9                  | <i>S. pupula</i> | <i>S. capitata</i>                              | Scotland: Blackford Pond (1996)                                          | AY571746             | –        |
|         | AFR1                  | <i>S. pupula</i> | <i>S. pupula</i> agg. “afro”                    | Tanzania: Ngorongoro crater (2002)                                       | EF143300             | EF151975 |
|         | BEL2                  | <i>S. pupula</i> | <i>S. pupula</i> agg. cf. “obese”               | Belgium: Kranepoel (51°04' N, 3°29' E) (2001)                            | EF143266             | EF151973 |
|         | D06_060               | <i>S. pupula</i> | <i>S. pupula</i> sensu lato                     | Germany, small river (52.52 N 13.47 E) (2004)                            | KM084945             | –        |
|         | D06_110               | <i>S. pupula</i> | <i>S. pupula</i> sensu lato                     | Germany, small river 52.52 N 13.47 E” (2004)                             | KM084958             | –        |
|         | RGBE Pd131            | <i>S. pupula</i> | <i>S. pupula</i> agg. “capitata-like”           | Australia: Victoria, Lake Purrumbete 38.28 S 143.21 E (2007)             | HQ317122<br>HQ337601 | –        |

|         |                                        |                          |                                   |                                                                                 |                      |          |
|---------|----------------------------------------|--------------------------|-----------------------------------|---------------------------------------------------------------------------------|----------------------|----------|
|         | UTEX LB<br>FD112                       | <i>S. pupula</i>         | <i>S. pupula</i> agg. “new<br>US” | USA: Iowa (1991)                                                                | HQ317123<br>HQ337602 | –        |
| Clade 4 | THR6                                   | <i>S. laevissima</i>     | <i>S. laevissima</i>              | Scotland: Threipmuir Reservoir (2003)                                           | EF143293             | –        |
|         | THR5                                   | <i>S. laevissima</i>     | <i>S. laevissima</i>              | Scotland: Threipmuir Reservoir (2003)                                           | EF143307             | –        |
|         | THR4                                   | <i>S. laevissima</i>     | <i>S. laevissima</i>              | Scotland: Threipmuir Reservoir (2003)                                           | EF143309             | EF151981 |
|         | THR3                                   | <i>S. laevissima</i>     | <i>S. laevissima</i>              | Scotland: Threipmuir Reservoir (2003)                                           | EF143313             | –        |
|         | THR2                                   | <i>S. laevissima</i>     | <i>S. laevissima</i>              | Scotland: Threipmuir Reservoir (1996)                                           | EF143265             | –        |
|         | THR1                                   | <i>S. laevissima</i>     | <i>S. laevissima</i>              | Scotland: Threipmuir Reservoir (1996)                                           | EF143263             | EF151979 |
|         | KEL-2015<br>clone<br>JAR89_B2<br>Run14 | <i>S. cf. laevissima</i> | <i>S. cf. laevissima</i>          | Canada: Ontario, Petawawa Forestry<br>Station 45.992966 N 77.399194 W<br>(2014) | KM999088             | –        |
|         | B385                                   | <i>S. balashovae</i>     | <i>S. balashovae</i>              | Russia: Lake Frolikha, Baikal region<br>(2012)                                  | MG515209             | MG515210 |
|         | HYU-<br>D014                           | <i>S. seminulum</i>      | <i>S. seminulum</i>               | South Korea, river stone                                                        | MK576038             | –        |
|         | D06_006                                | <i>S. seminulum</i>      | <i>S. seminulum</i>               | Germany, small river 52.52 N 13.47 E<br>(2004)                                  | KM084937             | –        |
|         | Styx 1<br>LCR-S-19-<br>1-1             | <i>S. sp.</i>            | <i>S. styxii</i>                  | New Zealand, Styx River                                                         | JQ610174             | –        |
|         | TCC461                                 | <i>S. seminulum</i>      | <i>S. seminulum</i>               | France: Mayotte, river (2009)                                                   | KC736613             | –        |
|         | TM 37                                  | <i>S. cf. seminulum</i>  | <i>S. cf. seminulum</i>           | Scotland: Threipmuir Reservoir (1997)                                           | EF143280             | EF151967 |
